# Supplementary material for: Association of Oral Anticoagulants and Verapamil or Diltiazem With Adverse Bleeding Events in Patients With Nonvalvular Atrial Fibrillation and Normal Kidney Function
Source: PubMed Central journal article supplement (PMC7182798; doi:10.1001/jamanetworkopen.2020.3593), 2020-04-24
Supplement: jamanetwopen-3-e203593-s001.pdf [file jamanetwopen-3-e203593-s001.pdf]

## Supplementary Online Content

Pham P, Schmidt S, Lesko L, Lip GYH, Brown JD. Association of oral anticoagulants and verapamil or diltiazem with adverse bleeding events in patients with nonvalvular atrial fibrillation and normal kidney function. *JAMA Netw Open*. 2020;3(4):e203593. doi:10.1001/jamanetworkopen.2020.3593

**eTable 1.** ICD 9-CM Codes for Comorbidities

**eTable 2.** ICD 9 Codes for HAS-BLED Score

**eTable 3.** ICD 9 Codes for CHA2DS2-VASc Score

**eTable 4.** ICD-9-CM Codes for Study Outcomes

**eReferences**

**eFigure 1.** Cohort Selection and Attrition

**eTable 5.** Standardized Percent Difference of Cohort's Baseline Characteristic After Inverse Probability of Treatment Weighting When Comparing Verapamil/Diltiazem Versus Amlodipine or Metoprolol Among Each DOAC Cohort

**eTable 6.** Standardized Difference of Cohort's Baseline Characteristic After Inverse Probability of Treatment Weighting When Comparing DOAC Together Among Cohort of Verapamil/Diltiazem, Amlodipine or Metoprolol

**eTable 7.** Number and Incident Rate of Adverse Bleeding Events Among Concomitant Users Of DOACs With Verapamil/Diltiazem and With Amlodipine

**eTable 8.** Number and Incident Rate of Adverse Bleeding Events Among Concomitant Users Of DOACs With Verapamil/Diltiazem and With Metoprolol

**eTable 9.** Hazard Ratio of Adverse Bleed Events Among Concomitant Users of Direct Oral Anticoagulant and Verapamil/Diltiazem Versus Amlodipine

**eTable 10.** Hazard Ratio of Adverse Bleed Events Among Concomitant Users of Direct Oral Anticoagulant and Verapamil/Diltiazem Versus Metoprolol

This supplementary material has been provided by the authors to give readers additional information about their work.

**eTable 1: ICD 9-CM codes for comorbidities**

| <b>Comorbidity</b>                           | <b>ICD-9 codes</b>                                                                                                                                   | <b>Ref</b>   |
|----------------------------------------------|------------------------------------------------------------------------------------------------------------------------------------------------------|--------------|
| <b>For stratification</b>                    |                                                                                                                                                      |              |
| Cancer                                       |                                                                                                                                                      | [21]         |
| -Solid tumor cancer                          | 140-195                                                                                                                                              |              |
| -Blood cancer                                | 200-208                                                                                                                                              |              |
| -Metastatic cancer                           | 196-199                                                                                                                                              |              |
| Renal disease                                |                                                                                                                                                      | [8]          |
| -Acute                                       | 584.5-584.9                                                                                                                                          | [9]          |
| -Chronic                                     |                                                                                                                                                      |              |
| Stage 1                                      | 585.1                                                                                                                                                |              |
| Stage 2_mild                                 | 585.2                                                                                                                                                |              |
| Stage                                        | 585.3                                                                                                                                                |              |
| 3_moderate                                   | 585.4                                                                                                                                                |              |
| Stage 4_severe                               | 585.5                                                                                                                                                |              |
| Stage 5                                      |                                                                                                                                                      |              |
| ESRD                                         | 585.6                                                                                                                                                | [8,10,12,13] |
| -Dialysis                                    | V45.1, V56.0, V56.1<br>39.95,54.93,54.98,38.95,39.27,<br>90935, 90937,90945,90947, 90951-90970,<br>90989, 90993, 90997, 90999, 90918-90925,<br>93990 |              |
| Liver disease                                |                                                                                                                                                      | [14]         |
| -Mild                                        | 070.22, 070.23, 070.32, 070.33,<br>070.44, 070.54, 070.6, 070.9,<br>570.x, 571.x, 573.3, 573.4,<br>573.8, 573.9, V42.7                               |              |
| Mediate or severe                            | 456.0–456.21, 572.2–572.8                                                                                                                            |              |
| Diabetes                                     |                                                                                                                                                      | [14]         |
| -without chronic complication                | 250.0–250.3, 250.8, 250.9                                                                                                                            |              |
| -with chronic complication                   | 250.4–250.7                                                                                                                                          |              |
| Hypertension                                 | 401.x-405.x                                                                                                                                          | [14]         |
| Hyperlipidemia                               | 272.0, 272.1, 272.2, 272.3, 272.4                                                                                                                    | [15]         |
| Obesity                                      | 278.00                                                                                                                                               | [14]         |
| Gastric ulcer                                | 531, 532, 533, 534                                                                                                                                   | [21]         |
| <b>For exclusion criteria</b>                |                                                                                                                                                      | [16]         |
| Mitral stenosis or prosthetic heart valve    | 394.0, 394.2, 396.0, 396.1, 396.8, V43.3, or V42.2                                                                                                   |              |
| Mitral or aortic valve repair or replacement | 35.10 to 35.14 or 35.20 to 35.28                                                                                                                     | [16]         |

|                                  |                                                                                                                                                                                                                                                                                                                                                                                                                                       |      |
|----------------------------------|---------------------------------------------------------------------------------------------------------------------------------------------------------------------------------------------------------------------------------------------------------------------------------------------------------------------------------------------------------------------------------------------------------------------------------------|------|
| Joint replacement                | 0080 0081 0082 0083 0084 8141 8142 8143<br>8144 8146 8147 8154 8155 0070 0071 0072<br>0073 0074 0075 0076 0077 0085 0086 0087<br>8151 8152 8153 8169 8148 8149 8156 8157<br>8159 8171 8172 8173 8174 8175 8179 8180<br>8181 8182 8183 8184 8185 8186 8187 8188<br>8197                                                                                                                                                                | [21] |
| <b>For confounding adjusting</b> |                                                                                                                                                                                                                                                                                                                                                                                                                                       |      |
| Cardiovascular disease           |                                                                                                                                                                                                                                                                                                                                                                                                                                       |      |
| -Deep vein thrombosis            | 451.x, 453.x                                                                                                                                                                                                                                                                                                                                                                                                                          | [17] |
| -Pulmonary embolism              | 415.x                                                                                                                                                                                                                                                                                                                                                                                                                                 | [17] |
| -Congestive Heart Failure        | 398.91, 402.01, 402.11, 402.91, 404.01,<br>404.03, 404.11,<br>404.13, 404.91, 404.93, 425.4–425.9, 428.x                                                                                                                                                                                                                                                                                                                              | [14] |
| -Coronary Artery Disease         | 410.00, 410.01, 410.02, 410.10, 410.11,<br>410.12, 410.20, 410.21, 410.22, 410.30,<br>410.31, 410.32, 410.40, 410.41, 410.42,<br>410.50, 410.51, 410.52, 410.60, 410.61,<br>410.62, 410.70, 410.71, 410.72, 410.80,<br>410.81, 410.82, 410.90, 410.91, 410.92,<br>411.0, 411.1, 411.81, 411.89, 412, 413.0,<br>413.1, 413.9, 414.00, 414.01, 414.02, 414.03,<br>414.04, 414.05, 414.06, 414.07, 414.8, 414.9,<br>V45.81, V45.82       | [10] |
| -Acute MI                        | 410                                                                                                                                                                                                                                                                                                                                                                                                                                   | [1]  |
| -Coronary revascularization      | 36.01-36.07, 36.09, 00.66, 36.1x                                                                                                                                                                                                                                                                                                                                                                                                      | [11] |
| -Heart failure                   | 402.01, 402.11, 402.91, 404.01, 404.03,<br>404.11, 404.13, 404.91, 404.93, 428.0, 428.1,<br>428.20, 428.21, 428.22, 428.23, 428.30,<br>428.31, 428.32, 428.33, 428.40, 428.41,<br>428.42, 428.43, 428.9                                                                                                                                                                                                                               | [10] |
| -Other ischemic heart disease    | 410.00, 410.01, 410.02, 410.10, 410.11,<br>410.12, 410.20, 410.21, 410.22, 410.30,<br>410.31, 410.32, 410.40, 410.41, 410.42,<br>410.50, 410.51, 410.52, 410.60, 410.61,<br>410.62, 410.70, 410.71, 410.72, 410.80,<br>410.81, 410.82, 410.90, 410.91, 410.92,<br>411.0, 411.1, 411.81, 411.89, 412, 413.0,<br>413.1, 413.9, 414.00, 414.01, 414.02, 414.03,<br>414.04, 414.05, 414.06, 414.07, 414.12,<br>414.2, 414.3, 414.8, 414.9 | [15] |
| -Stroke                          | 433.x1, 434.x1, 436, 430, 431                                                                                                                                                                                                                                                                                                                                                                                                         | [7]  |
| -Other cerebrovascular disease   | 430.x - 438.x                                                                                                                                                                                                                                                                                                                                                                                                                         | [21] |
| -TIA                             | 435.x                                                                                                                                                                                                                                                                                                                                                                                                                                 | [7]  |

|                          |                                                                                                                                                                               |      |
|--------------------------|-------------------------------------------------------------------------------------------------------------------------------------------------------------------------------|------|
| - <i>Cardioablation</i>  | 93650, 93651, 93652, 93653, 93654, 93656, 93655, 93657, 93462                                                                                                                 | [18] |
| - <i>Cardioversion</i>   | 99.61, 99.62, 99.69<br>92960, 92961                                                                                                                                           | [19] |
| Other medical conditions |                                                                                                                                                                               |      |
| - <i>Falls</i>           | E880-E888, E968.1, E987.0, E987.1, E987.2, E987.9, V15.88                                                                                                                     | [21] |
| - <i>Fracture</i>        | 820–821, 813, 812, 805                                                                                                                                                        | [21] |
| - <i>Syncope</i>         | 780.2                                                                                                                                                                         | [20] |
| - <i>Walker use</i>      | E0100, E0105, E0110, E0111, E0112, E0113, E0114, E0116, E0117, E0118, E0130, E0135, E0140, E0141, E0143, E0144, E0147, E0148, E0149, E0153, E0154, E0155, E0156, E0157, E0158 | [22] |

**eTable 2: ICD 9 Codes for HAS-BLED score [7]**

| <b>HAS-BLED</b>           | <b>Score</b> | <b>ICD-9-CM codes</b>                  |
|---------------------------|--------------|----------------------------------------|
| Hypertension              | 1            | 401.x-405.x                            |
| Abnormal renal function   | 1            | 585.3, 585.4                           |
| Abnormal liver function   | 1            | 070.x, 570, 571.x, 572.x, 573.0-5,     |
|                           |              | V42.7                                  |
| Stroke                    | 1            | 430, 431, 433.x1, 434.x1, 436          |
| Bleeding history or       | 1            | 280.x-287.x, 430, 431, 432.x, 852.x,   |
| predisposition            |              | 853.x, 456.0, 456.20, 530.21, 530.7,   |
|                           |              | 530.82, 531.0x, 531.2x, 531.4x,        |
|                           |              | 531.6x, 532.0x, 532.2x, 532.4x,        |
|                           |              | 532.6x, 533.0x, 533.2x, 533.4x,        |
|                           |              | 533.6x, 534.0x, 534.2x, 534.4x,        |
|                           |              | 534.6x, 535.01, 535.11, 535.21,        |
|                           |              | 535.31, 535.41, 535.51, 535.61,        |
|                           |              | 535.71, 537.83, 537.84, 562.02,        |
|                           |              | 562.03, 562.12, 562.13, 568.81, 569.3, |
|                           |              | 569.85, 578.x, 423.0, 459.0, 596.7,    |
|                           |              | 599.71, 719.1x, 784.8, 786.3           |
| Elderly (>65)             | 1            |                                        |
| Antiplatelet or NSAID use | 1            |                                        |
| Alcoholism                | 1            | 291.x, 303.x, 305.0x, 357.5, 425.5,    |
|                           |              | 535.3x, 571.0-571.3, 760.71, 980.0,    |
|                           |              | V11.3                                  |
| Maximum score             | 8            |                                        |

**eTable 3: ICD 9 Codes for CHA<sub>2</sub>DS<sub>2</sub>-VASc score [7]**

| <b>CHA<sub>2</sub>DS<sub>2</sub>-VASc</b> | <b>Score</b> | <b>ICD-9-CM codes</b>                 |
|-------------------------------------------|--------------|---------------------------------------|
| Congestive heart failure                  | 1            | 428.x, 402.x1, 404.x1, 404.x3, 398.91 |
| Hypertension                              | 1            | 401.x-405.x                           |
| Diabetes mellitus                         | 1            | 250.x, 357.2, 362.0x, 366.41          |
| Stroke/TIA/TE                             | 2            | 430, 431, 433.x1, 434.x1, 436, 435.x, |
|                                           |              | 444.x                                 |
| Vascular disease                          | 1            | 410-414, 443.8,443.9, 440.x           |
| Age≥75                                    | 2            |                                       |
| Age 65-74                                 | 1            |                                       |
| Female sex                                | 1            |                                       |
| Maximum score                             | 9            |                                       |

**eTable 4: ICD-9-CM codes for study outcomes**

| <b>Outcomes</b>          | <b>ICD-9 codes</b>                                                                                                                                                                                                                                                                                                                                                                                                                                                                                                                                                                                                              | <b>Reference</b> |
|--------------------------|---------------------------------------------------------------------------------------------------------------------------------------------------------------------------------------------------------------------------------------------------------------------------------------------------------------------------------------------------------------------------------------------------------------------------------------------------------------------------------------------------------------------------------------------------------------------------------------------------------------------------------|------------------|
| <b>Major bleeding</b>    | <i>-&gt;Bleeding events in inpatient only and meet the definition for major bleeding: a bleeding event with (i) a critical site code, (ii) a transfusion, or (iii) death</i>                                                                                                                                                                                                                                                                                                                                                                                                                                                    |                  |
| Overall                  | Critical site: Intracranial: 430, 431, 432, 852.0, 852.2, 852.4, 853.0; Extracranial: 336.1, 363.6, 372.72, 376.32, 377.42, 379.23, 719.1, 729.92, 729.97, 423.0, 593.81, 772.5, 866.01, 866.02, 866.11, 866.12<br>Transfusions: a) ICD-9 PRC: 9903, 9904, 9905, 9906, 9907, 9909, b) HCPC: P9010, P9011, P9016, P9017, P9019, P9020                                                                                                                                                                                                                                                                                            | [1]              |
| ICH                      | 430, 431, 432, 852.0, 852.2, 852.4, 853.0                                                                                                                                                                                                                                                                                                                                                                                                                                                                                                                                                                                       | [1]              |
| GI bleeding              | <i>-&gt;Bleeding at GI site and need a transfusion or lead to death.</i><br>455.2, 455.5, 455.8, 456.0x, 456.20, 530.7x, 530.82, 531.00, 531.01, 531.20, 531.21, 531.40, 531.41, 531.60, 531.61, 532.00, 532.01, 532.20, 532.21, 532.40, 532.41, 532.60, 532.61, 533.00, 533.01, 533.20, 533.21, 533.40, 533.41, 533.60, 533.61, 534.00, 534.01, 534.20, 534.21, 534.40, 534.41, 534.60, 534.61, 535.01, 535.11, 535.21, 535.31, 535.41, 535.51, 535.61, 537.83, 537.84, 562.02, 562.03, 562.12, 562.13, 568.81, 569.3x or 569.85, 569.86, 578.0x, 578.1x, 578.9x<br><i>(combine these with codes for transfusion or death)</i> | [1]              |
| <b>Moderate bleeding</b> | <i>-&gt;Bleeding events in inpatient or emergency department that do not meet the criteria for major bleeding</i>                                                                                                                                                                                                                                                                                                                                                                                                                                                                                                               |                  |
| Overall                  | 531.0x, 531.2x, 531.4x, 531.6x, 532.0x, 532.2x, 532.4x, 532.6x, 533.0x, 533.2x, 533.4x, 533.6x, 534.0x, 534.2x, 534.4x, 534.6x, 535.01, 535.11, 535.21, 535.31, 535.41, 535.51, 535.61, 537.83, 456.0, 456.20, 530.7, 530.82, 578.0, 455.2, 455.5, 455.8, 562.02, 562.03, 562.12, 562.13, 568.81, 569.3, 569.85, 578.1, 578.9, 593.81, 599.7, 623.8, 626.2, 626.6, 423.0, 459.0, 568.81, 719.1x, 784.7, 784.8, 786.3                                                                                                                                                                                                            | [1]              |
| GI bleeding              | 455.2, 455.5, 455.8, 456.0x, 456.20, 530.7x, 530.82, 531.00, 531.01, 531.20, 531.21, 531.40, 531.41, 531.60, 531.61, 532.00, 532.01, 532.20, 532.21, 532.40, 532.41, 532.60, 532.61, 533.00, 533.01, 533.20, 533.21, 533.40, 533.41, 533.60, 533.61, 534.00, 534.01, 534.20, 534.21, 534.40, 534.41, 534.60, 534.61, 535.01, 535.11, 535.21, 535.31, 535.41, 535.51, 535.61, 537.83, 537.84, 562.02, 562.03, 562.12, 562.13, 568.81, 569.3x or 569.85, 569.86, 578.0x, 578.1x, 578.9x                                                                                                                                           |                  |
| <b>Minor bleeding</b>    | Bleeding events in outpatient office visits only.<br>Use same codes for moderate bleeding but in outpatients.                                                                                                                                                                                                                                                                                                                                                                                                                                                                                                                   |                  |

|                                    |                        |       |
|------------------------------------|------------------------|-------|
| <b>Acute MI</b>                    | 410                    | [2-6] |
| <b>Stroke or systemic embolism</b> |                        | [7]   |
| Ischemic stroke                    | 433.x1, 434.x1, or 436 |       |
| Hemorrhagic stroke                 | 430, 431               |       |
| Systemic embolism                  | 444.x                  |       |
| TIA                                | 435.x                  |       |



## eREFERENCES

1. Graham DJ, Reichman ME, Wernecke M, et al. Stroke, Bleeding, and Mortality Risks in Elderly Medicare Beneficiaries Treated With Dabigatran or Rivaroxaban for Nonvalvular Atrial Fibrillation. *JAMA Intern Med.* Vol 176. United States 2016:1662-1671.
2. Petersen LA, Wright S, Normand SL, Daley J. Positive predictive value of the diagnosis of acute myocardial infarction in an administrative database. *J Gen Intern Med.* Sep 1999;14(9):555-558.
3. Levy AR, Tamblyn RM, Fitchett D, McLeod PJ, Hanley JA. Coding accuracy of hospital discharge data for elderly survivors of myocardial infarction. *Can J Cardiol.* Nov 1999;15(11):1277-1282.
4. Austin PC, Daly PA, Tu JV. A multicenter study of the coding accuracy of hospital discharge administrative data for patients admitted to cardiac care units in Ontario. *Am Heart J.* Vol 144. United States 2002:290-296.
5. Kiyota Y, Schneeweiss S, Glynn RJ, Cannuscio CC, Avorn J, Solomon DH. Accuracy of Medicare claims-based diagnosis of acute myocardial infarction: estimating positive predictive value on the basis of review of hospital records. *Am Heart J.* Vol 148. United States 2004:99-104.
6. Choma NN, Griffin MR, Huang RL, et al. An algorithm to identify incident myocardial infarction using Medicaid data. *Pharmacoepidemiol Drug Saf.* Nov 2009;18(11):1064-1071.
7. Noseworthy PA, Yao X, Abraham NS, Sangaralingham LR, McBane RD, Shah ND. Direct Comparison of Dabigatran, Rivaroxaban, and Apixaban for Effectiveness and Safety in Nonvalvular Atrial Fibrillation. *Chest.* Vol 150. United States: A 2016 American College of Chest Physicians. Published by Elsevier Inc; 2016:1302-1312.
8. Waikar SS, Wald R, Chertow GM, et al. Validity of International Classification of Diseases, Ninth Revision, Clinical Modification Codes for Acute Renal Failure. *J Am Soc Nephrol.* Jun 2006;17(6):1688-1694.
9. OPTUM. Documentation & Coding of Chronic Kidney Disease (CKD). 2013. Available at [https://www.cmocares.org/documents/diagnostic-guidelines/chronic-kidney/Chronic\\_Kidney\\_Disease\\_Reporting1.pdf](https://www.cmocares.org/documents/diagnostic-guidelines/chronic-kidney/Chronic_Kidney_Disease_Reporting1.pdf). Assessed on Oct 01, 2017
10. 2011 Physician quality reporting system. Measure specifications manual for claims and registry reporting of individual measures. Available: [https://www.cms.gov/Medicare/Quality-Initiatives-Patient-Assessment-Instruments/PQRS/downloads/2011\\_PhysQualRptg\\_MeasureSpecificationsManual\\_033111.pdf](https://www.cms.gov/Medicare/Quality-Initiatives-Patient-Assessment-Instruments/PQRS/downloads/2011_PhysQualRptg_MeasureSpecificationsManual_033111.pdf). Assessed on 01/10/2017
11. Epstein AJ, Polsky D, Yang F, Yang L, Groeneveld PW. Coronary Revascularization Trends in the United States, 2001-2008. *JAMA.* 2011;305(17):1769-1776. doi:10.1001/jama.2011.55
12. UnitedHealthcare. Dialysis services. Oxford Health Plans. Available at [https://www.oxhp.com/secure/policy/dialysis\\_services.pdf](https://www.oxhp.com/secure/policy/dialysis_services.pdf). Assessed on Oct 01, 2017
13. Taneja C, Berger A, Inglese GW, et al. Can dialysis patients be accurately identified using healthcare claims data? *Perit Dial Int.* Sep-Oct 2014;34(6):643-651.
14. Quan H, Sundararajan V, Halfon P, et al. Coding algorithms for defining comorbidities in ICD-9-CM and ICD-10 administrative data. *Med Care.* Vol 43. United States 2005:1130-1139.
15. Buccaneer AGDC. Chronic Condition Data Warehouse. 2012. Available at <https://www.ccwdata.org/web/guest/condition-categories>. Assessed on Oct 01, 2019
16. Brown JD, Shewale AR, Talbert JC. Adherence to Rivaroxaban, Dabigatran, and Apixaban for Stroke Prevention in Incident, Treatment-Naïve Nonvalvular Atrial Fibrillation. *Journal of managed care & specialty pharmacy.* 2016;22(11):1319-1329.
17. Tamariz L, Harkins T, Nair V. A systematic review of validated methods for identifying venous

- thromboembolism using administrative and claims data. *Pharmacoepidemiol Drug Saf*. Jan 2012;21 Suppl 1:154-162.
18. Medtronic. Catheter ablation reimbursement guide. 2015. Available at <http://www.medicalbillingcodings.org/2013/05/cardiology-cpt-codes-new-changes.html>. Assessed on Oct 01, 2017
  19. Noseworthy PA, Kapa S, Deshmukh AJ, et al. Risk of stroke after catheter ablation versus cardioversion for atrial fibrillation: A propensity-matched study of 24,244 patients. *Heart Rhythm*. Vol 12. United States: 2015 Heart Rhythm Society. Published by Elsevier Inc; 2015:1154-1161.
  20. Schuur JD, Justice A. Measuring quality of care in syncope: case definition affects reported electrocardiogram use but does not bias reporting. *Acad Emerg Med*. Jan 2009;16(1):40-49.
  21. Clinical Classifications Software (CCS) for ICD9-CM. Available: <https://www.hcup-us.ahrq.gov/toolssoftware/ccs/AppendixASingleDX.txt>. Assessed on 01/10/2017
  22. HCPCS codes. Available at <https://hcpcs.codes/e-codes/>. Assessed on 01/10/2017

**eFigure 1: Cohort selection and attrition**

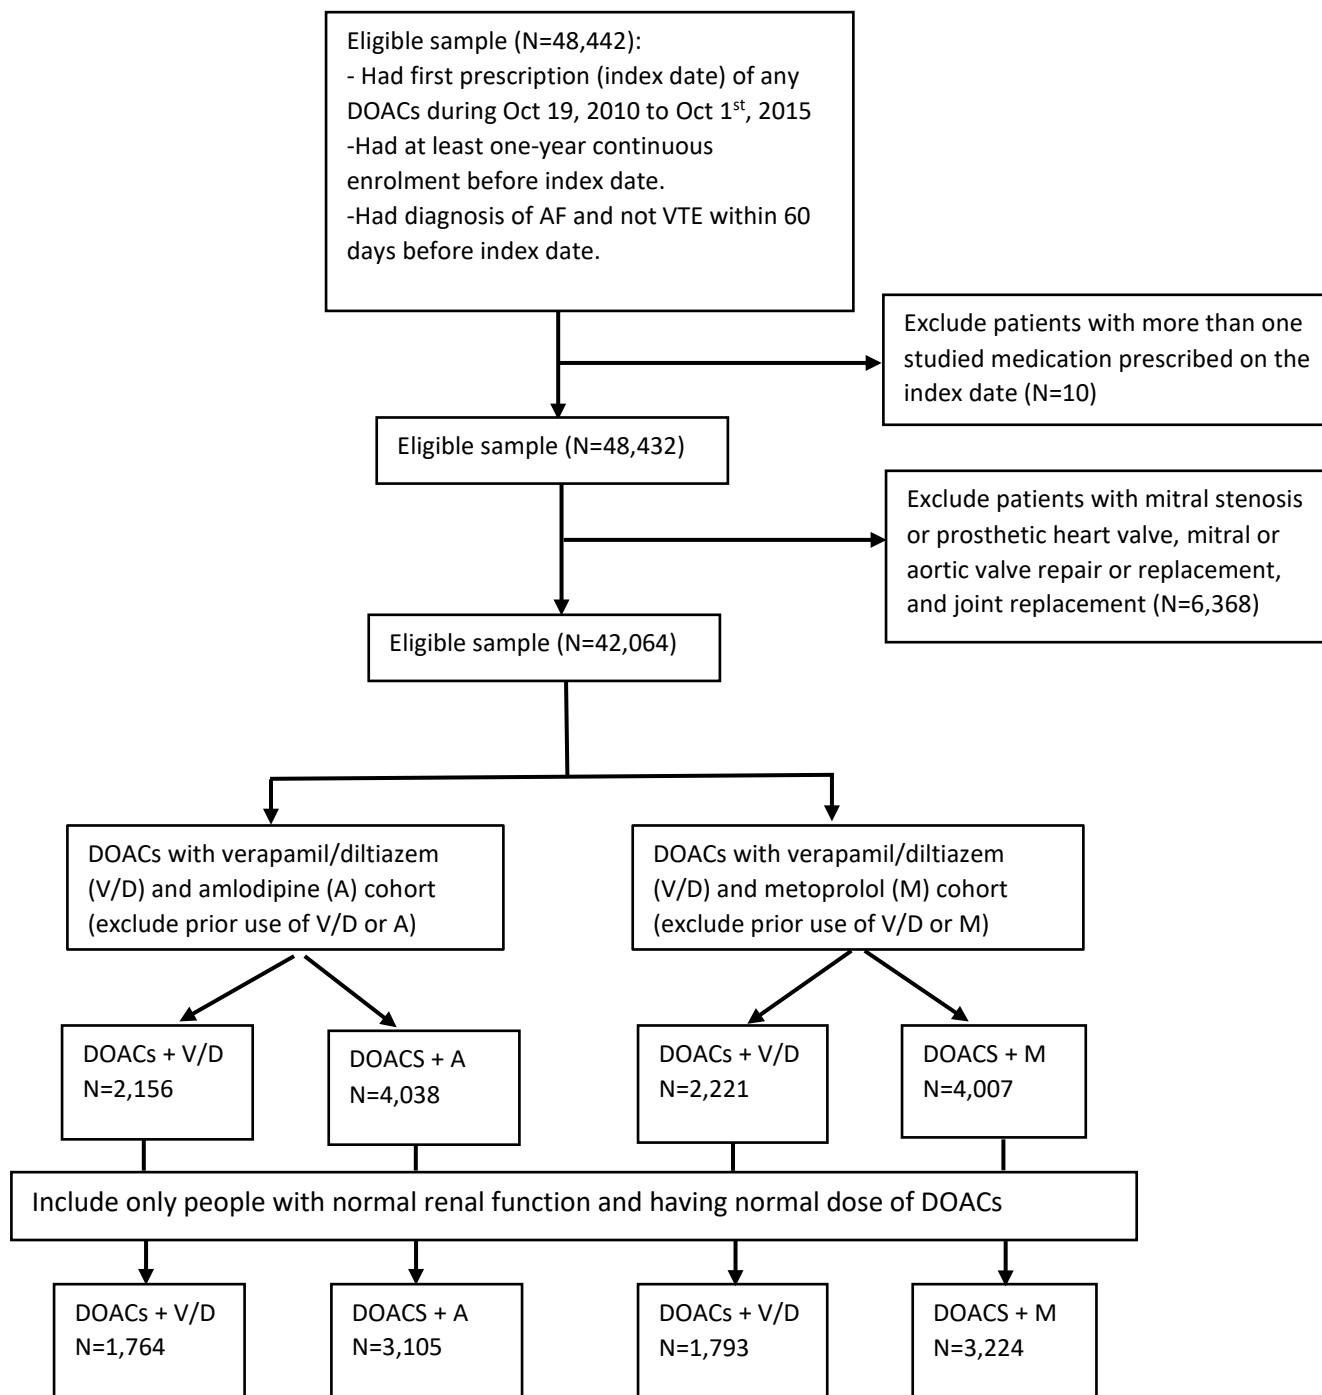

**eTable 5: Standardized percent difference of cohort's baseline characteristic after inverse probability of treatment weighting when comparing verapamil/diltiazem versus amlodipine or metoprolol among each DOAC cohort. Differences <10% are considered to indicate well balance covariate distribution between comparison groups.**

|                                   | Dabigatran | Rivaroxaban | Apixaban | Dabigatran | Rivaroxaban | Apixaban |
|-----------------------------------|------------|-------------|----------|------------|-------------|----------|
| <b>Patients' characteristic</b>   | V/D vs A   | V/D vs A    | V/D vs A | V/D vs M   | V/D vs M    | V/D vs M |
| <b>Demographic</b>                |            |             |          |            |             |          |
| Age, %                            |            |             |          |            |             |          |
| <65                               | -3.05      | 1.62        | -11.21   | -1.52      | 0.10        | -1.3     |
| 65-<70                            | -1.87      | -3.03       | 1.02     | 0.78       | -0.46       | 0.48     |
| 70-<75                            | 2.10       | -0.10       | 10.15    | 1.85       | -0.07       | 0.82     |
| 75-<80                            | 3.67       | 1.11        | -1.04    | -1.38      | 0.57        | 0.84     |
| 80-<85                            | 1.97       | -1.02       | 7.22     | 1.85       | -0.50       | -0.17    |
| ≥ 85                              | -1.57      | 1.24        | 5.31     | -0.97      | 0.63        | -0.09    |
| Sex, %                            |            |             |          |            |             |          |
| Female                            | -2.21      | -2.16       | -0.77    | -1.35      | 1.17        | 3.57     |
| <b>Medical history, %</b>         |            |             |          |            |             |          |
| <b>General</b>                    |            |             |          |            |             |          |
| Diabetes w/o complication         | -1.74      | 1.86        | -5.59    | 4.37       | 0.61        | 3.77     |
| Diabetes w/complication           | -4.09      | 3.96        | 1.51     | 3.02       | 0.49        | -0.10    |
| Hypertension                      | 3.34       | 2.36        | 3.79     | -1.03      | -0.37       | -2.71    |
| Hypercholesterolemia              | 3.99       | 1.81        | -1.92    | 0.06       | -1.10       | 1.55     |
| Liver failure                     |            |             |          |            |             |          |
| Mild                              | -0.90      | 2.25        | 1.49     | 5.42       | -2.03       | 2.42     |
| Moderate or severe                | 0.00       | 3.27        | -4.77    | 4.37       | 0.00        | -0.05    |
| Cancer                            |            |             |          |            |             |          |
| Solid                             | -5.05      | -1.03       | 3.67     | 0.78       | 1.02        | 2.21     |
| Fluid                             | 1.31       | 1.01        | -5.41    | 1.06       | -2.60       | -2.92    |
| Metastatic                        | -1.85      | 2.18        | 1.37     | -1.35      | -0.80       | 2.52     |
| Obesity                           | 3.32       | -4.65       | -4.73    | 3.63       | -0.27       | 2.81     |
| Peptic ulcer disease              | 0.35       | 1.88        | 8.36     | 0.23       | -0.58       | 6.50     |
| Prior hospitalized bleeding event | -0.32      | 1.31        | 0.87     | 0.17       | 0.77        | 1.89     |
| Smoking                           | -1.61      | 2.04        | -2.01    | -0.24      | -0.78       | -0.50    |
| <b>Cardiovascular disease</b>     |            |             |          |            |             |          |
| Acute myocardial infarction       |            |             |          |            |             |          |
| Past 1-30 days                    | -1.41      | -2.71       | 5.56     | -3.37      | 3.01        | 9.76     |
| Past 31-180 days                  | -1.11      | -1.06       | 4.82     | -1.25      | 1.85        | 3.04     |
| Past 181-365 days                 | 2.18       | -3.97       | 4.58     | -0.52      | 3.17        | 0.83     |
| Coronary revascularization        | 0.59       | 0.07        | 1.26     | 0.58       | 0.25        | 1.33     |

|                                              |       |       |       |       |       |       |
|----------------------------------------------|-------|-------|-------|-------|-------|-------|
| Heart failure                                |       |       |       |       |       |       |
| Hospitalized                                 | -0.23 | -0.35 | -0.24 | -0.68 | 1.77  | 0.12  |
| Outpatient                                   | -4.14 | 3.21  | 5.24  | -6.89 | 1.74  | 2.70  |
| Coronary artery disease                      | 3.78  | 1.16  | 1.84  | 3.91  | 6.68  | 5.72  |
| Other ischemic heart disease                 | 3.83  | 0.23  | 3.14  | 4.66  | 6.67  | 5.13  |
| Stroke                                       |       |       |       |       |       |       |
| Past 1-30 days                               | -0.36 | 3.04  | 1.46  | -0.91 | 1.02  | -2.66 |
| Past 31-180 days                             | -6.22 | -3.12 | -1.43 | -1.75 | -7.02 | -0.48 |
| Past 181-365 days                            | -0.62 | 2.60  | 3.11  | -1.84 | 0.38  | 4.43  |
| Other cerebrovascular disease                | -5.46 | 5.05  | 0.85  | -2.01 | 1.23  | -1.61 |
| Transient ischemic attack (TIA)              | -3.99 | -2.31 | 0.69  | 2.64  | 1.28  | -0.90 |
| Cardioversion                                | 3.17  | -8.77 | -2.76 | -5.88 | -3.28 | 1.86  |
| <b>Other medical conditions</b>              |       |       |       |       |       |       |
| Falls                                        | -5.05 | 2.84  | 8.58  | 2.95  | -5.82 | 1.52  |
| Fractures                                    | -1.39 | 4.29  | 1.08  | -1.94 | 0.99  | -7.66 |
| Syncope                                      | -3.26 | -2.38 | -0.04 | 0.34  | -0.54 | -0.36 |
| Walker use                                   | -0.93 | 4.17  | -0.84 | -0.34 | -0.24 | 2.08  |
| CCI, Mean (SD)                               | -5.35 | 3.31  | 3.91  | 0.16  | 0.59  | 4.69  |
| CHA <sub>2</sub> DS <sub>2</sub> -VASc Score |       |       |       |       |       |       |
| 0-1                                          | -4.10 | -3.55 | -5.13 | 0.14  | 0.12  | -2.06 |
| 2                                            | 4.26  | 6.03  | 0.11  | 5.78  | -0.55 | 0.66  |
| 3                                            | 1.20  | -5.90 | 4.66  | -6.76 | 0.21  | 3.13  |
| ≥4                                           | -2.96 | 5.29  | 0.78  | -0.23 | 0.57  | -2.60 |
| HAS-BLED score                               |       |       |       |       |       |       |
| 0-1                                          | -1.84 | 0.20  | -5.22 | -1.09 | -1.12 | 1.47  |
| 2                                            | 0.77  | 0.51  | 0.52  | 2.90  | -1.08 | -5.94 |
| 3                                            | -1.66 | 3.65  | -8.36 | -4.48 | 3.40  | 2.30  |
| ≥4                                           | 2.07  | -3.52 | 9.94  | 2.34  | -0.88 | 2.07  |
| <b>Medication use, %</b>                     |       |       |       |       |       |       |
| <b>General</b>                               |       |       |       |       |       |       |
| Estrogen therapy                             | 1.72  | -1.52 | 3.09  | 1.98  | -1.49 | 1.98  |
| Histamine 2 antagonists                      | 3.80  | 1.10  | 0.52  | 1.08  | -1.38 | 5.81  |
| NSAID                                        | 2.57  | -1.72 | 1.02  | -6.21 | -0.81 | 4.21  |
| Proton pump inhibitors                       | 0.48  | -0.15 | 0.47  | -3.95 | -1.31 | 5.19  |
| SSRI antidepressants                         | 1.09  | 5.67  | -1.89 | -7.56 | -1.57 | 1.49  |
| <b>Cardiovascular</b>                        |       |       |       |       |       |       |
| ACE inhibitors                               | -2.66 | -0.80 | -2.80 | 0.83  | 1.87  | -0.07 |
| ARBs                                         | 2.61  | 1.37  | 4.68  | -4.51 | 0.26  | 3.46  |
| Antiarrhythmics                              | -2.62 | 0.92  | -2.60 | -3.26 | -1.24 | -5.85 |
| Other anticoagulants                         | -0.89 | 0.45  | -0.72 | -0.37 | -0.10 | 0.10  |
| Antiplatelet                                 | 2.32  | -0.97 | 6.53  | 3.51  | 3.40  | 0.96  |
| B-blocker                                    | 1.55  | -0.70 | 6.56  | 2.47  | 0.03  | 1.67  |

|                               |       |        |       |       |       |       |
|-------------------------------|-------|--------|-------|-------|-------|-------|
| Digoxin                       | 1.46  | 3.55   | -0.67 | 2.19  | -0.19 | 0.20  |
| Diuretics                     |       |        |       |       |       |       |
| Loop                          | -3.29 | 3.16   | -1.48 | -6.00 | 1.51  | -1.55 |
| Potassium sparing             | 0.29  | -4.18  | 1.68  | -0.41 | -1.65 | 4.11  |
| Thiazide and other            | 0.79  | 0.81   | 1.51  | -5.00 | -3.39 | 0.47  |
| Nitrates                      | -0.02 | 6.29   | 8.05  | 2.76  | 4.06  | 9.88  |
| Statins                       | 1.75  | 1.44   | -2.13 | -3.87 | 3.44  | 3.36  |
| Fibrates                      | 3.01  | 2.33   | -0.02 | -4.44 | 1.69  | 2.68  |
| Other antihyperlipidemic      | 0.31  | 0.07   | 6.32  | -6.00 | 1.51  | -1.55 |
| <b>Diabetes related</b>       |       |        |       |       |       |       |
| Insulin                       | -1.35 | -2.28  | -0.96 | -0.07 | -0.22 | -0.47 |
| Metformin                     | 2.11  | 0.11   | 0.37  | -3.54 | 0.22  | 2.36  |
| Sulfonylurea                  | -0.82 | -5.87  | -1.78 | 1.04  | -0.69 | 1.61  |
| Other                         | -1.03 | 6.53   | -6.23 | 3.14  | 1.10  | 2.15  |
| <b>Metabolic inhibitors</b>   |       |        |       |       |       |       |
| Amiodarone                    | -2.80 | 0.59   | 4.67  | -1.03 | 0.98  | -1.18 |
| Dronedarone                   | -0.50 | -0.31  | -0.63 | -4.94 | 0.38  | -6.19 |
| Azole antifungals             | 0.95  | 1.70   | 0.59  | 1.00  | -0.39 | -1.21 |
| <b>Metabolic inducers</b>     |       |        |       |       |       |       |
| Carbamazepine                 | -0.83 | 1.93   | 6.82  | 0.44  | -1.00 | 7.96  |
| Phenytoin                     | -5.33 | 2.96   | -4.77 | -5.31 | -1.27 | 0.00  |
| Phenobarbital                 | 0.13  | 0.17   | 0.00  | -3.06 | -3.21 | 0.00  |
| <b>Prescriber specialty</b>   |       |        |       | 0.44  | -1.00 | 7.96  |
| Internal medicine             | 0.84  | -10.95 | 1.87  | 1.51  | -0.38 | -2.92 |
| Family practice               | -0.43 | -1.39  | 2.25  | -0.51 | -1.04 | 0.71  |
| Geriatric medicine            | 3.15  | 3.27   | 0.00  | 3.09  | 0.00  | 0.00  |
| Cardiology                    | 2.00  | 6.04   | -1.89 | -3.70 | 1.58  | 1.66  |
| Critical care medicine        | 3.15  | -4.49  | 4.82  | 4.37  | -0.45 | 0.00  |
| Hematology                    | -1.65 | -3.18  | 0.00  | -3.06 | -0.04 | 4.59  |
| Oncology                      | -4.35 | 0.19   | 0.00  | -0.20 | -3.21 | 4.59  |
| <b>Healthcare utilization</b> |       |        |       |       |       |       |
| Outpatient visits, %          |       |        |       |       |       |       |
| ≤ 9                           | 2.26  | 4.23   | -0.46 | -2.87 | 2.44  | -6.03 |
| >9-16                         | 0.42  | -7.74  | 0.68  | 0.25  | 0.40  | 1.72  |
| >16-29                        | -2.64 | 0.25   | -1.45 | 2.11  | -2.51 | 0.35  |
| >29                           | 0.11  | 4.46   | 1.34  | 0.21  | -0.02 | 3.66  |
| Inpatient visits, Mean (SD)   | -1.67 | -1.28  | -0.82 | 1.70  | -2.39 | 2.49  |
| ER visits                     | -2.39 | 2.41   | 2.99  | 5.35  | -2.32 | -1.32 |
| Number of Rx, %               |       |        |       |       |       |       |
| ≤ 6                           | -0.14 | 2.70   | -2.78 | 2.05  | 4.08  | -5.93 |
| >6-9                          | -1.37 | -2.45  | -1.11 | -5.42 | -0.34 | 3.16  |
| >9-13                         | 4.01  | -1.11  | -0.70 | -0.71 | -1.68 | 0.74  |
| >13                           | -2.45 | 1.25   | 4.02  | 4.50  | -1.44 | 1.37  |

V/D: verapamil/diltiazem; A: amlodipine;

CCI: Charlson comorbidity index; NSAID: nonsteroidal anti-inflammatory drugs; SSRI: selective serotonin reuptake inhibitors; ACE inhibitors: Angiotensin-converting enzyme inhibitors; ARB: Angiotensin II receptor blockers; ER: emergency room

| <b>eTable 6: Standardized difference of cohort's baseline characteristic after inverse probability of treatment weighting when comparing DOAC together among cohort of verapamil/diltiazem, amlodipine or metoprolol</b> |                            |        |                   |        |                   |        |
|--------------------------------------------------------------------------------------------------------------------------------------------------------------------------------------------------------------------------|----------------------------|--------|-------------------|--------|-------------------|--------|
| <b>Patients' characteristic</b>                                                                                                                                                                                          | <b>Verapamil/Diltiazem</b> |        | <b>Amlodipine</b> |        | <b>Metoprolol</b> |        |
|                                                                                                                                                                                                                          | D vs A                     | R vs A | D vs A            | R vs A | D vs A            | R vs A |
| <b>Demographic</b>                                                                                                                                                                                                       |                            |        |                   |        |                   |        |
| Age, %                                                                                                                                                                                                                   |                            |        |                   |        |                   |        |
| <65                                                                                                                                                                                                                      | -0.96                      | -0.96  | 1.86              | 0.62   | -0.43             | -0.97  |
| 65-<70                                                                                                                                                                                                                   | -2.12                      | -1.7   | -0.82             | -0.75  | -0.26             | 0.05   |
| 70-<75                                                                                                                                                                                                                   | 3.19                       | 1.56   | 1.97              | 1.7    | 0.04              | 0.07   |
| 75-<80                                                                                                                                                                                                                   | -0.46                      | -0.07  | -3.28             | -1.22  | -1.59             | -1.46  |
| 80-<85                                                                                                                                                                                                                   | 1.05                       | 2      | -2.4              | -3.32  | 1.44              | 2.05   |
| ≥ 85                                                                                                                                                                                                                     | 1.48                       | 1.72   | 2.16              | 3.87   | 4.1               | 3.93   |
| Sex, %                                                                                                                                                                                                                   |                            |        |                   |        |                   |        |
| Female                                                                                                                                                                                                                   | 1.46                       | 0.34   | 0.72              | 0.37   | 2.58              | 3.74   |
| <b>Medical history, %</b>                                                                                                                                                                                                |                            |        |                   |        |                   |        |
| <b>General</b>                                                                                                                                                                                                           |                            |        |                   |        |                   |        |
| Diabetes w/o complication                                                                                                                                                                                                | -0.4                       | -1.41  | -2.77             | -3.71  | -0.19             | 0.13   |
| Diabetes w/complication                                                                                                                                                                                                  | 2.04                       | 2.23   | -0.43             | -1.27  | -1.65             | -1     |
| Hypertension                                                                                                                                                                                                             | -0.66                      | -1.36  | -1.5              | -1.32  | 1.77              | 2.29   |
| Hypercholesterolemia                                                                                                                                                                                                     | 1.97                       | 1.25   | -3.61             | -3.47  | -3.84             | -4.02  |
| Liver failure                                                                                                                                                                                                            |                            |        |                   |        |                   |        |
| Mild                                                                                                                                                                                                                     | 1.18                       | 1.4    | 0.71              | 0.5    | -1.64             | -1.01  |
| Moderate or severe                                                                                                                                                                                                       | -3.35                      | -3.35  | 0                 | 2.54   | 2.68              | 0      |
| Cancer                                                                                                                                                                                                                   |                            |        |                   |        |                   |        |
| Solid                                                                                                                                                                                                                    | 0.43                       | 0.77   | -0.43             | 0.12   | 2.18              | 2.14   |
| Fluid                                                                                                                                                                                                                    | 1.34                       | 1.45   | -0.11             | -0.06  | 0.73              | 0.03   |
| Metastatic                                                                                                                                                                                                               | 1.25                       | 0.72   | -1.14             | -0.6   | -0.52             | 0.91   |
| Obesity                                                                                                                                                                                                                  | -2.2                       | -1.86  | 0.14              | -0.69  | -0.28             | -1.03  |
| Peptic ulcer disease                                                                                                                                                                                                     | 10.54                      | 10.5   | -3.81             | -4.4   | -2.83             | -2.83  |
| Prior hospitalized bleeding event                                                                                                                                                                                        | 1.79                       | 2.23   | 0.08              | 0.15   | 2.5               | 2.75   |
| Smoking                                                                                                                                                                                                                  | -4.01                      | -4.24  | 2.1               | 1.4    | 3.99              | 2.51   |
| <b>Cardiovascular disease</b>                                                                                                                                                                                            |                            |        |                   |        |                   |        |
| Acute myocardial infarction                                                                                                                                                                                              |                            |        |                   |        |                   |        |
| Past 1-30 days                                                                                                                                                                                                           | -1.67                      | -3.17  | 1.52              | 1.43   | 4.12              | 2.86   |
| Past 31-180 days                                                                                                                                                                                                         | 0.53                       | -0.84  | 1.22              | 0.65   | -0.05             | -0.26  |
| Past 181-365 days                                                                                                                                                                                                        | 6.43                       | 6.14   | -0.71             | -1.29  | -4.49             | -5.46  |
| Coronary revascularization                                                                                                                                                                                               | -0.8                       | -1.79  | 2.36              | 3.82   | -1.13             | -0.37  |
| Heart failure                                                                                                                                                                                                            |                            |        |                   |        |                   |        |
| Hospitalized                                                                                                                                                                                                             | 2.33                       | 1.79   | -0.02             | 0.47   | 1.62              | 1.46   |
| Outpatient                                                                                                                                                                                                               | 2.87                       | 1.2    | 1.7               | 0.33   | -3.38             | -2.1   |



|                                              |       |       |       |       |       |       |
|----------------------------------------------|-------|-------|-------|-------|-------|-------|
| Coronary artery disease                      | 1.55  | 0.31  | 3.43  | 3.95  | 0.89  | 0.22  |
| Other ischemic heart disease                 | 3.06  | 2.48  | 3.7   | 3.72  | 1.63  | 0.66  |
| Stroke                                       |       |       |       |       |       |       |
| Past 1-30 days                               | -2.3  | -5.26 | 0.78  | 1.74  | 2.43  | 1.99  |
| Past 31-180 days                             | -3.59 | -4.27 | 3.14  | 5.7   | -0.98 | 0.04  |
| Past 181-365 days                            | 4.58  | 3.46  | 3.21  | 2.85  | 0.74  | 0.24  |
| Other cerebrovascular disease                | -1.37 | -1.33 | 5.01  | 4.86  | 0.38  | -0.79 |
| Transient ischemic attack (TIA)              | -0.22 | -0.33 | 4.95  | 5.85  | 1.3   | 2.09  |
| Cardioversion                                | 2.38  | 3.2   | 0.1   | -0.36 | 1.43  | 0.3   |
| <b>Other medical conditions</b>              |       |       |       |       |       |       |
| Falls                                        | 1.1   | 0.29  | 1.76  | -0.18 | 0.67  | 4.95  |
| Fractures                                    | -0.55 | -2.11 | -0.07 | 3.43  | -0.67 | 4.22  |
| Syncope                                      | 2.22  | 2.23  | 0.18  | -0.22 | 2     | 3.3   |
| Walker use                                   | -2.3  | -1.96 | 1.32  | 1.1   | 0.15  | 1.28  |
| CCI, Mean (SD)                               | 3.11  | 2.01  | -0.54 | -1.12 | 1.79  | 3.37  |
| CHA <sub>2</sub> DS <sub>2</sub> -VASc Score |       |       |       |       |       |       |
| 0-1                                          | -4.87 | -3.9  | -0.67 | -1.77 | 0.58  | -1.03 |
| 2                                            | 3.21  | 2.95  | -0.9  | -0.63 | -1.51 | -1.99 |
| 3                                            | 3.79  | 3.99  | -0.58 | 0.11  | 0.48  | 2.05  |
| ≥4                                           | -3.03 | -4.97 | 4.16  | 4.37  | 1.22  | 2.85  |
| HAS-BLED score                               |       |       |       |       |       |       |
| 0-1                                          | -0.35 | -0.31 | 2.43  | 1.72  | 4.13  | 2.99  |
| 2                                            | -0.16 | -0.47 | -0.1  | -0.96 | -3.75 | -2.16 |
| 3                                            | 0.17  | 0.24  | -4.02 | -4.06 | -2.81 | -2.55 |
| ≥4                                           | 0.3   | 0.46  | 1.74  | 2.94  | 2.03  | 1.48  |
| <b>Medication use, %</b>                     |       |       |       |       |       |       |
| <b>General</b>                               |       |       |       |       |       |       |
| Estrogen therapy                             | 2.05  | 2.66  | 2.84  | 2.29  | 0.03  | 0.03  |
| Histamine 2 antagonists                      | -2.03 | -2.39 | 3.21  | 3.33  | 4.76  | 1.77  |
| NSAID                                        | -0.06 | -1.76 | 2.28  | 2.52  | -0.69 | 2.67  |
| Proton pump inhibitors                       | 1.54  | 2.44  | -0.26 | 0.67  | 2.04  | 2.17  |
| SSRI antidepressants                         | 2.8   | 0.01  | -1.32 | -0.29 | 0.26  | 0.51  |
| <b>Cardiovascular</b>                        |       |       |       |       |       |       |
| ACE inhibitors                               | -5.15 | -4.27 | 2.78  | 2.51  | 1.21  | 0.78  |
| ARBs                                         | 4.64  | 5.51  | 0.31  | 1.07  | 1.05  | 2.2   |
| Antiarrhythmics                              | -1.8  | -0.79 | 2.86  | 3.04  | 0.39  | -1.79 |
| Other anticoagulants                         | 6.58  | 6.56  | 0.08  | -0.54 | -3.16 | -4.46 |
| Antiplatelet                                 | -0.05 | 0.33  | 3.18  | 4.62  | 1.37  | 0.94  |
| B-blocker                                    | 2.92  | 1.9   | 2.06  | 2.21  | 1.46  | 1.8   |
| Digoxin                                      | -1.37 | -1.35 | -0.74 | -2.1  | 1.05  | 1.91  |

|                                      |       |       |       |       |       |       |
|--------------------------------------|-------|-------|-------|-------|-------|-------|
| Diuretics                            |       |       |       |       |       |       |
| Loop                                 | 1.28  | 2.09  | 0.74  | 2.21  | -0.7  | 1.68  |
| Potassium sparing                    | -2.16 | -3.42 | 0.98  | 0.78  | 1.87  | 1.2   |
| Thiazide and other                   | -1.47 | -2.51 | 2.32  | 2.9   | 0.41  | 0.92  |
| Nitrates                             | 2.95  | 1.86  | 2.48  | 2.64  | 2.39  | 0.16  |
| Statins                              | -0.9  | -1.88 | -0.19 | 0.89  | 0.3   | 1.01  |
| Fibrates                             | 2.61  | 5.6   | 1.46  | 1.61  | 3.97  | 3.05  |
| Other antihyperlipidemic             | 6.17  | 6.45  | -0.31 | 0.44  | 1.01  | -0.11 |
| <b><i>Diabetes related</i></b>       |       |       |       |       |       |       |
| Insulin                              | 0.11  | 1.42  | 0.6   | 0.29  | 1.14  | 0.54  |
| Metformin                            | 2.65  | 1.51  | -2.99 | -3.06 | -1.98 | -1.07 |
| Sulfonylurea                         | 2.3   | 2.41  | 0.13  | 1.15  | -2.95 | -3.21 |
| Other                                | -3.09 | -5.7  | -3.42 | -4.35 | -2.66 | -1.67 |
| <b><i>Metabolic inhibitors</i></b>   |       |       |       |       |       |       |
| Amiodarone                           | 2.58  | 3.09  | 0.12  | -0.4  | 2.65  | 0.35  |
| Dronedarone                          | -0.26 | -0.01 | 1.04  | 1.34  | -4.35 | -3.56 |
| Azole antifungals                    | 1.48  | 2.84  | 2.32  | 1.38  | -3.72 | -4.7  |
| <b><i>Metabolic inducers</i></b>     |       |       |       |       |       |       |
| Carbamazepine                        | 6.44  | 6.23  | 0.2   | 1.42  | 1.2   | 4.68  |
| Phenytoin                            | 2.62  | 1.57  | 0     | 5.08  | 0.00  | 2.67  |
| Phenobarbital                        | 4.16  | 4.17  | 3.53  | 3.53  | 0.00  | 0.00  |
| <b><i>Prescriber specialty</i></b>   |       |       |       |       |       |       |
| Internal medicine                    | -3.37 | -2.37 | -0.84 | -0.40 | 1.86  | -0.05 |
| Family practice                      | -0.48 | -1.99 | 2.76  | 3.33  | 0.21  | 1.09  |
| Geriatric medicine                   | 0.00  | 0.00  | 4.04  | 4.03  | 2.68  | 0.00  |
| Cardiology                           | -1.96 | -1.21 | -1.27 | -1.93 | 2.49  | 0.98  |
| Critical care medicine               | 0.00  | 4.72  | -0.03 | -4.23 | 3.50  | 3.49  |
| Hematology                           | 6.23  | 6.14  | 3.60  | 0.00  | -3.70 | -0.01 |
| Oncology                             | 5.95  | 6.69  | 0.00  | 2.54  | 0.00  | -3.31 |
| <b><i>Healthcare utilization</i></b> |       |       |       |       |       |       |
| Outpatient visits, %                 |       |       |       |       |       |       |
| ≤ 9                                  | 3.35  | 2.89  | 0.23  | -0.88 | -0.35 | -0.21 |
| >9-16                                | 5.5   | 6.61  | -4.75 | -4.06 | 2.84  | 0.39  |
| >16-29                               | -6.84 | -6.23 | 0.54  | 0.4   | -2.23 | -0.68 |
| >29                                  | -1.39 | -2.87 | 4.97  | 5.6   | -0.36 | 0.6   |
| Inpatient visits, Mean (SD)          | 0.01  | -1.81 | 6.92  | 8.36  | 4.66  | 5.33  |
| ER visits                            | -2.17 | -2.9  | 3.49  | 2.5   | 1.43  | 2.3   |
| Number of Rx, %                      |       |       |       |       |       |       |
| ≤ 6                                  | 0.24  | 0.88  | 1.57  | 0.43  | -3.31 | -4.36 |
| >6-9                                 | 0.42  | -0.95 | -2.49 | -2.71 | -0.29 | -0.14 |
| >9-13                                | -3.58 | -2.86 | 0.72  | 1.11  | -0.06 | 1.14  |
| >13                                  | 2.94  | 3.04  | 0.45  | 1.18  | 3.6   | 3.19  |

V/D: verapamil/diltiazem; A: amlodipine;

CCI: Charlson comorbidity index; NSAID: nonsteroidal anti-inflammatory drugs; SSRI: selective serotonin reuptake inhibitors; ACE inhibitors: Angiotensin-converting enzyme inhibitors; ARB: Angiotensin II receptor blockers; ER: emergency room

| <b>eTable 7: Number and incident rate of adverse bleeding events among concomitant users of DOACs with verapamil/diltiazem and with amlodipine</b>                                                       |                   |                 |               |                    |                 |               |                  |                 |               |
|----------------------------------------------------------------------------------------------------------------------------------------------------------------------------------------------------------|-------------------|-----------------|---------------|--------------------|-----------------|---------------|------------------|-----------------|---------------|
| <b>Bleeding categories</b>                                                                                                                                                                               | <b>Dabigatran</b> |                 |               | <b>Rivaroxaban</b> |                 |               | <b>Apixaban</b>  |                 |               |
|                                                                                                                                                                                                          | <b>Event (N)</b>  | <b>Crude ER</b> | <b>Adj ER</b> | <b>Event (N)</b>   | <b>Crude ER</b> | <b>Adj ER</b> | <b>Event (N)</b> | <b>Crude ER</b> | <b>Adj ER</b> |
| <b>Verapamil/Diltiazem</b>                                                                                                                                                                               |                   |                 |               |                    |                 |               |                  |                 |               |
| Overall bleed                                                                                                                                                                                            | 51                | 256.2           | 244.9         | 56                 | 274.8           | 270.5         | 17               | 159.1           | 165.3         |
| Overall GI bleed                                                                                                                                                                                         | 30                | 146.0           | 149.7         | 23                 | 108.0           | 84.0          | 6                | 54.8            | 50.0          |
| Major/moderate bleed                                                                                                                                                                                     | 12                | 56.9            | 54.4          | 15                 | 69.4            | 73.0          | 4                | 36.5            | 32.5          |
| Major/moderate GI bleed                                                                                                                                                                                  | 7                 | 33.2            | 29.6          | 5                  | 23.0            | 19.0          | 1                | 9.1             | 9.9           |
| Minor bleed                                                                                                                                                                                              | 49                | 245.3           | 239.4         | 52                 | 254.4           | 246.7         | 15               | 140.2           | 152.9         |
| GI minor bleed                                                                                                                                                                                           | 29                | 141.3           | 145.6         | 22                 | 103.3           | 77.4          | 6                | 54.8            | 50.0          |
| Stroke + SE                                                                                                                                                                                              | 0                 | NA              | NA            | 1                  | 4.4             | 8.8           | 0                | NA              | NA            |
| <b>Amlodipine</b>                                                                                                                                                                                        |                   |                 |               |                    |                 |               |                  |                 |               |
| Overall bleed                                                                                                                                                                                            | 71                | 177.0           | 158.4         | 98                 | 270.1           | 273.4         | 34               | 207.7           | 185.1         |
| Overall GI bleed                                                                                                                                                                                         | 32                | 77.7            | 68.6          | 47                 | 125.9           | 131.4         | 14               | 82.1            | 71.9          |
| Major/moderate bleed                                                                                                                                                                                     | 12                | 28.8            | 24.1          | 22                 | 58.0            | 59.9          | 4                | 23.0            | 20.8          |
| Major/moderate GI bleed                                                                                                                                                                                  | 7                 | 16.8            | 13.1          | 12                 | 31.4            | 37.2          | 1                | 5.8             | 4.7           |
| Minor bleed                                                                                                                                                                                              | 68                | 169.4           | 151.1         | 93                 | 255.5           | 258.4         | 32               | 194.9           | 174.5         |
| GI minor bleed                                                                                                                                                                                           | 31                | 75.6            | 66.8          | 44                 | 117.5           | 123.7         | 14               | 82.1            | 71.9          |
| Stroke + SE                                                                                                                                                                                              | 0                 | NA              | NA            | 1                  | 2.6             | 2.2           | 1                | 5.5             | 12.8          |
| Abbreviations: ER=event rate; Adj: adjusted; GI=gastrointestinal; SE: systemic embolism; D=dabigatran; R=rivaroxaban; A=apixaban; DOAC=direct acting oral anticoagulants.<br>*rate per 1000 person years |                   |                 |               |                    |                 |               |                  |                 |               |

| <b>eTable 8: Number and incident rate of adverse bleeding event among concomitant users of DOACs with verapamil/diltiazem and with metoprolol</b>                                                        |                   |                 |               |                    |                 |               |                  |                 |               |
|----------------------------------------------------------------------------------------------------------------------------------------------------------------------------------------------------------|-------------------|-----------------|---------------|--------------------|-----------------|---------------|------------------|-----------------|---------------|
| <b>Bleeding categories</b>                                                                                                                                                                               | <b>Dabigatran</b> |                 |               | <b>Rivaroxaban</b> |                 |               | <b>Apixaban</b>  |                 |               |
|                                                                                                                                                                                                          | <b>Event (N)</b>  | <b>Crude ER</b> | <b>Adj ER</b> | <b>Event (N)</b>   | <b>Crude ER</b> | <b>Adj ER</b> | <b>Event (N)</b> | <b>Crude ER</b> | <b>Adj ER</b> |
| <b>Verapamil/Diltiazem</b>                                                                                                                                                                               |                   |                 |               |                    |                 |               |                  |                 |               |
| Overall bleed                                                                                                                                                                                            | 53                | 248.2           | 291.3         | 62                 | 278.5           | 234.7         | 19               | 163.9           | 170.5         |
| Overall GI bleed                                                                                                                                                                                         | 30                | 139.1           | 171.6         | 25                 | 108.0           | 84.7          | 7                | 62.1            | 88.7          |
| Major/moderate bleed                                                                                                                                                                                     | 12                | 54.4            | 85.0          | 15                 | 66.4            | 55.8          | 5                | 44.2            | 29.6          |
| Major/moderate GI bleed                                                                                                                                                                                  | 7                 | 31.8            | 50.0          | 5                  | 21.9            | 18.6          | 1                | 8.8             | 4.7           |
| Minor bleed                                                                                                                                                                                              | 51                | 237.6           | 275.6         | 58                 | 258.4           | 223.4         | 17               | 145.3           | 140.2         |
| GI minor bleed                                                                                                                                                                                           | 29                | 134.3           | 167.5         | 24                 | 103.3           | 82.1          | 7                | 62.1            | 88.7          |
| Stroke +SE                                                                                                                                                                                               | 0                 | NA              | NA            | 1                  | 4.4             | 3.3           | 0                | NA              | NA            |
| <b>Metoprolol</b>                                                                                                                                                                                        |                   |                 |               |                    |                 |               |                  |                 |               |
| Overall bleed                                                                                                                                                                                            | 80                | 201.1           | 199.7         | 127                | 316.8           | 314.6         | 45               | 223.4           | 219.4         |
| Overall GI bleed                                                                                                                                                                                         | 32                | 76.7            | 72.3          | 53                 | 122.6           | 119.0         | 19               | 94.5            | 104.0         |
| Major/moderate bleed                                                                                                                                                                                     | 11                | 24.5            | 25.2          | 23                 | 55.8            | 57.3          | 4                | 15.3            | 20.1          |
| Major/moderate GI bleed                                                                                                                                                                                  | 5                 | 9.9             | 9.1           | 11                 | 26.3            | 26.3          | 2                | 5.1             | 11.0          |
| Minor bleed                                                                                                                                                                                              | 78                | 196.0           | 194.9         | 122                | 302.6           | 300.4         | 42               | 211.7           | 209.5         |
| GI minor bleed                                                                                                                                                                                           | 30                | 74.1            | 70.4          | 51                 | 117.5           | 114.2         | 18               | 94.5            | 104.0         |
| Stroke + SE                                                                                                                                                                                              | 1                 | 2.2             | 2.6           | 1                  | 2.2             | 2.2           | 0                | NA              | NA            |
| Abbreviations: ER=event rate; Adj: adjusted; GI=gastrointestinal; SE: systemic embolism; D=dabigatran; R=rivaroxaban; A=apixaban; DOAC=direct acting oral anticoagulants.<br>*rate per 1000 person years |                   |                 |               |                    |                 |               |                  |                 |               |

| <b>eTable 9: Hazard ratio of adverse bleed events among concomitant users of direct oral anticoagulant and verapamil/diltiazem versus amlodipine</b> |                                   |                                    |                                 |
|------------------------------------------------------------------------------------------------------------------------------------------------------|-----------------------------------|------------------------------------|---------------------------------|
| <b>Bleeding categories</b>                                                                                                                           | <b>Dabigatran<br/>HR (95% CI)</b> | <b>Rivaroxaban<br/>HR (95% CI)</b> | <b>Apixaban<br/>HR (95% CI)</b> |
| <b>Unadjusted analysis</b>                                                                                                                           |                                   |                                    |                                 |
| Overall bleed                                                                                                                                        | 1.40 (0.98-2.01)                  | 1.02 (0.74-1.42)                   | 0.77 (0.43-1.37)                |
| Overall GI bleed                                                                                                                                     | 1.84 (1.12-3.03) *                | 0.85 (0.52-1.41)                   | 0.67 (0.26-1.75)                |
| Major/moderate bleed                                                                                                                                 | 1.95 (0.87-4.34)                  | 1.22 (0.63-2.36)                   | 1.60 (0.40-6.41)                |
| Major/moderate GI bleed                                                                                                                              | 1.97 (0.69-5.64)                  | 0.73 (0.26-2.08)                   | 1.79 (0.11-28.69)               |
| Minor bleed                                                                                                                                          | 1.40 (0.97-2.03)                  | 1.00 (0.71-1.41)                   | 0.72 (0.39-1.32)                |
| GI minor bleed                                                                                                                                       | 1.84 (1.11-3.06) *                | 0.87 (0.52-1.46)                   | 0.67 (0.26-1.75)                |
| <b>Diltiazem alone</b>                                                                                                                               |                                   |                                    |                                 |
| Overall bleed                                                                                                                                        | 1.56 (1.06-2.30) *                | 1.06 (0.75-1.51)                   | 1.11 (0.60-2.04)                |
| Overall GI bleed                                                                                                                                     | 2.06 (1.20-3.54) *                | 0.58 (0.32-1.08)                   | 0.81 (0.28-2.37)                |
| Major/moderate bleed                                                                                                                                 | 2.30 (0.95-5.55)                  | 1.42 (0.73-2.76)                   | 2.02 (0.44-9.17)                |
| Major/moderate GI bleed                                                                                                                              | 2.17 (0.65-7.27)                  | 0.64 (0.21-1.93)                   | 2.80 (0.14-55.74)               |
| Minor bleed                                                                                                                                          | 1.61 (1.09-2.39) *                | 1.01 (0.70-1.46)                   | 1.08 (0.57-2.03)                |
| GI minor bleed                                                                                                                                       | 2.12 (1.23-3.64) *                | 0.55 (0.29-1.05)                   | 0.81 (0.28-2.37)                |
| <b>Verapamil alone</b>                                                                                                                               |                                   |                                    |                                 |
| Overall bleed                                                                                                                                        | 1.34 (0.64-1.82)                  | 0.71 (0.35-1.44)                   | 0.13 (0.01-1.94)                |
| Overall GI bleed                                                                                                                                     | 2.70 (1.15-6.34) *                | 0.83 (0.32-2.13)                   | 0.33 (0.02-5.18)                |
| Major/moderate bleed                                                                                                                                 | 2.12 (0.46-9.74)                  | 0.51 (0.09 -2.93)                  | NA                              |
| Major/moderate GI bleed                                                                                                                              | 2.79 (0.43-17.98)                 | NA                                 | NA                              |
| Minor bleed                                                                                                                                          | 1.29 (0.60-2.80)                  | 0.74 (0.36-1.51)                   | 0.14 (0.01-2.08)                |
| GI minor bleed                                                                                                                                       | 2.44 (0.99-6.01)                  | 0.87 (0.34-2.25)                   | 0.33 (0.02-5.18)                |
| <b>15-day gap</b>                                                                                                                                    |                                   |                                    |                                 |
| Overall bleed                                                                                                                                        | 1.35 (0.97-1.88)                  | 0.85 (0.62-1.17)                   | 1.02 (0.58-1.81)                |
| Overall GI bleed                                                                                                                                     | 1.87 (1.19-2.93) *                | 0.60 (0.35-1.00)                   | 0.71 (0.25-2.01)                |
| Major/moderate bleed                                                                                                                                 | 2.52 (1.18- 5.41) *               | 1.18 (0.64-2.18)                   | 2.41 (0.60-9.64)                |
| Major/moderate GI bleed                                                                                                                              | 3.58 (1.25-10.21) *               | 0.64 (0.24-1.68)                   | 2.17 (0.11-43.09)               |
| Minor bleed                                                                                                                                          | 1.36 (0.98-1.90)                  | 0.84 (0.60-1.16)                   | 0.98 (0.54-1.77)                |
| GI minor bleed                                                                                                                                       | 1.83 (1.16 -2.90) *               | 0.57 (0.34-0.98) *                 | 0.71 (0.25-2.01)                |
| <b>Any diagnosis code position for outcome</b>                                                                                                       |                                   |                                    |                                 |
| Overall bleed                                                                                                                                        | 1.74 (1.49-2.02)                  | 0.87 (0.77-0.99) †                 | 1.01 (0.81-1.27)                |
| Overall GI bleed                                                                                                                                     | 1.93 (1.55-2.41) †                | 0.46 (0.36-0.57) †                 | 0.45 (0.29-0.71) †              |
| Major/moderate bleed                                                                                                                                 | 1.89 (1.07-3.32) †                | 1.06 (0.74-1.55)                   | 1.92 (0.71-5.16)                |
| Major/moderate GI bleed                                                                                                                              | 1.97 (0.75-5.17)                  | 0.30 (0.15-0.58) †                 | 5.66 (0.42-75.69)               |
| Minor bleed                                                                                                                                          | 1.75 (1.50-2.05) *                | 0.87 (0.76-0.99) †                 | 1.02 (0.81-1.29)                |
| GI minor bleed                                                                                                                                       | 1.91 (1.53-2.39) †                | 0.43 (0.34-0.54) †                 | 0.41 (0.25-0.65) †              |
| <b>Standardized mortality ratio weight</b>                                                                                                           |                                   |                                    |                                 |
| Overall bleed                                                                                                                                        | 1.31 (0.97-1.77)                  | 1.45 (0.86-1.53)                   | 0.48 (0.13-1.80)                |
| Overall GI bleed                                                                                                                                     | 2.16 (1.43-3.26) *                | 1.19 (0.76-1.87)                   | 0.56 (0.24-1.30)                |
| Major/moderate bleed                                                                                                                                 | 2.34 (1.21-4.52) *                | 1.64 (0.92-2.90)                   | 1.23 (0.41-3.69)                |
| Major/moderate GI bleed                                                                                                                              | 2.60 (1.08-6.24) *                | 1.15 (0.44-3.00)                   | 1.03 (0.12-8.78)                |
| Minor bleed                                                                                                                                          | 1.32 (0.97-1.79)                  | 1.11 (0.82-1.49)                   | 0.60 (0.35-1.03)                |
| GI minor bleed                                                                                                                                       | 2.29 (1.50-3.49) *                | 1.20 (0.75-1.89)                   | 0.56 (0.24-1.30)                |

Abbreviations: HR=hazard ratio; CI=confidence interval; GI=gastrointestinal; D=dabigatran; R=rivaroxaban; A=apixaban; DOAC=direct acting oral anticoagulants  
NA: no event in one of the comparison groups  
\*Denotes statistically significant results at  $P<0.05$   
†Denotes proportional hazard assumption violated as the interaction between treatment and time was significant

| <b>eTable 10: Hazard ratio of adverse bleed events among concomitant use of direct oral anticoagulant and verapamil/diltiazem versus metoprolol</b> |                                   |                                    |                                 |
|-----------------------------------------------------------------------------------------------------------------------------------------------------|-----------------------------------|------------------------------------|---------------------------------|
| <b>Bleeding categories</b>                                                                                                                          | <b>Dabigatran<br/>HR (95% CI)</b> | <b>Rivaroxaban<br/>HR (95% CI)</b> | <b>Apixaban<br/>HR (95% CI)</b> |
| <b>Unadjusted result</b>                                                                                                                            |                                   |                                    |                                 |
| Overall bleed                                                                                                                                       | 1.21 (0.85-1.72)                  | 0.89 (0.65-1.21)                   | 0.73 (0.42-1.28)                |
| Overall GI bleed                                                                                                                                    | 1.78 (1.08-2.95) *                | 0.88 (0.54-1.44)                   | 0.67 (0.28-1.59)                |
| Major/moderate bleed                                                                                                                                | 2.21 (0.95-5.11)                  | 1.21 (0.63-2.33)                   | 2.87 (0.68-12.02)               |
| Major/moderate GI bleed                                                                                                                             | 3.19 (0.93-10.91)                 | 0.84 (0.29-2.43)                   | 1.75 (0.11-28.04)               |
| Minor bleed                                                                                                                                         | 1.19 (0.83-1.70)                  | 0.86 (0.63-1.19)                   | 0.68 (0.38-1.23)                |
| GI minor bleed                                                                                                                                      | 1.78 (1.07-2.97) *                | 0.88 (0.53-1.45)                   | 0.67 (0.28-1.59)                |
| <b>Diltiazem alone</b>                                                                                                                              |                                   |                                    |                                 |
| Overall bleed                                                                                                                                       | 1.35 (0.93-1.95)                  | 0.77 (0.54-1.10)                   | 0.72 (0.39-1.34)                |
| Overall GI bleed                                                                                                                                    | 2.17 (1.28-3.68) *                | 0.76 (0.43-1.34)                   | 0.52 (0.19-1.44)                |
| Major/moderate bleed                                                                                                                                | 2.67 (1.15-6.20) *                | 1.07 (0.52-2.20)                   | 1.86 (0.42-8.15)                |
| Major/moderate GI bleed                                                                                                                             | 4.31 (1.20-15.49) *               | 0.91 (0.29-2.80)                   | 0.54 (0.03-11.09)               |
| Minor bleed                                                                                                                                         | 1.36 (0.94-1.97)                  | 0.75 (0.52-1.09)                   | 0.57 (0.28-1.13)                |
| GI minor bleed                                                                                                                                      | 2.23 (1.31-3.78) *                | 0.76 (0.43-1.36)                   | 0.52 (0.19-1.44)                |
| <b>Verapamil alone</b>                                                                                                                              |                                   |                                    |                                 |
| Overall bleed                                                                                                                                       | 1.76 (1.01-3.06) *                | 0.72 (0.37-1.40)                   | 1.00 (0.40-2.52)                |
| Overall GI bleed                                                                                                                                    | 2.92 (1.40-6.11) *                | 0.52 (0.15-1.78)                   | 2.06 (0.77-5.48)                |
| Major/moderate bleed                                                                                                                                | 5.84 (2.20-15.49) *               | 0.71 (0.15-3.26)                   | NA                              |
| Major/moderate GI bleed                                                                                                                             | 9.82 (1.40-40.10) *               | NA                                 | NA                              |
| Minor bleed                                                                                                                                         | 1.49 (0.82-2.72)                  | 0.75 (0.39-1.47)                   | 1.04 (0.41-2.62)                |
| GI minor bleed                                                                                                                                      | 2.71 (1.26-5.87) *                | 0.54 (0.16-1.85)                   | 2.06 (0.77-5.48)                |
| <b>15-day gap</b>                                                                                                                                   |                                   |                                    |                                 |
| Overall bleed                                                                                                                                       | 1.35 (0.98-1.86)                  | 0.70 (0.51-0.96) *                 | 0.83 (0.49-1.38)                |
| Overall GI bleed                                                                                                                                    | 2.01 (1.26-3.20) *                | 0.60 (0.36-0.99) *                 | 0.77 (0.36-1.65)                |
| Major/moderate bleed                                                                                                                                | 2.71 (1.36-5.38) *                | 0.96 (0.50-1.83)                   | 2.09 (0.54-8.06)                |
| Major/moderate GI bleed                                                                                                                             | 4.75 (1.69-13.39) *               | 0.92 (0.33-2.51)                   | 0.41 (0.02-8.48)                |
| Minor bleed                                                                                                                                         | 1.31 (0.95-1.81)                  | 0.70 (0.51-0.96) *                 | 0.69 (0.40-1.21)                |
| GI minor bleed                                                                                                                                      | 2.01 (1.25-3.22) *                | 0.60 (0.36-1.00)                   | 0.77 (0.36-1.65)                |
| <b>Any diagnosis code position for outcome</b>                                                                                                      |                                   |                                    |                                 |
| Overall bleed                                                                                                                                       | 1.23 (1.07-1.40) †                | 0.91 (0.81-1.03) †                 | 0.67 (0.52-0.87) †              |
| Overall GI bleed                                                                                                                                    | 1.92 (1.56-2.37) †                | 0.63 (0.51-0.79) †                 | 0.35 (0.23-0.55) *              |
| Major/moderate bleed                                                                                                                                | 1.72 (1.06-2.77) *                | 0.88 (0.59-1.31)                   | 1.71 (0.73-4.00)                |
| Major/moderate GI bleed                                                                                                                             | 3.78 (1.64-8.72) *                | 0.36 (0.16-0.82) †                 | 0.26 (0.03-2.14)                |
| Minor bleed                                                                                                                                         | 1.21 (1.06-1.38) †                | 0.91 (0.80-1.03) †                 | 0.64 (0.49-0.84) †              |
| GI minor bleed                                                                                                                                      | 1.90 (1.54-2.35) †                | 0.62 (0.49-0.78) †                 | 0.35 (0.22-0.55) *              |
| <b>Standardized mortality ratio weight</b>                                                                                                          |                                   |                                    |                                 |
| Overall bleed                                                                                                                                       | 1.26 (0.93-1.72)                  | 0.87 (0.66-1.15)                   | 0.86 (0.52-1.43)                |
| Overall GI bleed                                                                                                                                    | 2.01 (1.31-3.09) *                | 0.80 (0.52-1.22)                   | 1.09 (0.48-2.50)                |
| Major/moderate bleed                                                                                                                                | 3.69 (1.72-7.91) *                | 1.26 (0.72-2.21)                   | 10.77 (2.12-54.73) *            |
| Major/moderate GI bleed                                                                                                                             | 3.27 (1.24-8.63) *                | 0.72 (0.28-1.84)                   | 10.28 (0.29-355.88)             |



|                                                                                                                                                                                                                                                                                                                                                                                                                                                                               |                    |                  |                  |
|-------------------------------------------------------------------------------------------------------------------------------------------------------------------------------------------------------------------------------------------------------------------------------------------------------------------------------------------------------------------------------------------------------------------------------------------------------------------------------|--------------------|------------------|------------------|
| Minor bleed                                                                                                                                                                                                                                                                                                                                                                                                                                                                   | 1.27 (0.92-1.73)   | 0.85 (0.64-1.13) | 0.78 (0.46-1.33) |
| GI minor bleed                                                                                                                                                                                                                                                                                                                                                                                                                                                                | 2.12 (1.36-3.29) * | 0.79 (0.51-1.23) | 1.09 (0.48-2.50) |
| <p>Abbreviations: HR=hazard ratio; CI=confidence interval; GI=gastrointestinal; D=dabigatran;<br/> R=rivaroxaban; A=apixaban; DOAC=direct acting oral anticoagulants<br/> NA: no event in one of the comparison groups<br/> *Denotes statistically significant results at <math>P&lt;0.05</math><br/> †Denotes proportional hazard assumption violated as the interaction between treatment and time was significant and a covariate for time was entered into the model.</p> |                    |                  |                  |
